# Supplementary material for: Health inequity in workers of Latin America and the Caribbean
Source: Int J Equity Health. 2020 Jul 1;19:109. doi: 10.1186/s12939-020-01228-x (PMC7329389; doi:10.1186/s12939-020-01228-x)
Supplement: Supplementary file 1 — Additional file 1: Supplementary Table A. Distribution (percentage) of the population sample by country and sex (%) according to age group, education level, and occupation. Supplementary Tabla B. Self-perceived health scale in surveys from 15 countries. Supplementary Table C. Prevalence of poor self-perceived health (%) and 95% confidence interval. Supplementary Table D. Prevalence of poor self-perceived health (%) and Kuznets relative index with 95% confidence interval. Continue… Supplementary Table D. Prevalence of poor self-perceived health (%) and Kuznets relative index with 95% confidence interval [file 12939_2020_1228_MOESM1_ESM.docx]

**SUPPLEMENTARY MATERIAL**

**Supplementary Table A. Distribution (percentage) of the population sample by country and sex (%) according to age group, education level, and occupation**

|  |  |  |  | Age groups (%) | | | |  | Educational Level (%) | | | |  | Occupational categories (%) | | | | |
| --- | --- | --- | --- | --- | --- | --- | --- | --- | --- | --- | --- | --- | --- | --- | --- | --- | --- | --- |
|  |  |  |  |  |  | Non-manual | | Manual | | |
| **Country / Survey (year)** | **Sex** | **n** |  | <25 | 25­–44 | 45–64 | >65 |  | >Low | Low | Middle | High |  | Skilled | Non-skilled | Skilled | Non-skilled | |
| **Argentina** |  |  |  |  |  |  |  |  |  |  |  |  |  |  |  |  |  | |
| Encuesta nacional de Factores de Riesgo (2013) | Women | 5.940 |  | 16.6 | 48.0 | 29.6 | 5.8 |  | 7.0 | 33.7 | 24.9 | 34.5 |  | - | - | - | - | |
| Men | 14.120 |  | 12.6 | 50.9 | 31.7 | 4.8 |  | 6.4 | 34.9 | 27.9 | 30.8 |  | - | - | - | - | |
| **Brazil** |  |  |  |  |  |  |  |  |  |  |  |  |  |  |  |  |  | |
| Pesquisa Nacional de Saúde  (2013) | Women | 38,938 |  | 15.4 | 52.6 | 30.0 | 1.9 |  | 1.2 | 28.0 | 40.1 | 30.8 |  | 26.9 | 37.9 | 11.5 | 23.7 | |
| Men | 50,811 |  | 15.6 | 50.1 | 30.8 | 3.6 |  | 1.6 | 39.2 | 38.8 | 20.4 |  | 21.7 | 20.5 | 41.6 | 16.2 | |
| **Chile** |  |  |  |  |  |  |  |  |  |  |  |  |  |  |  |  |  | |
| Encuesta de Calidad de Vida y Salud (2016) | Women | 1.364 |  | 10.3 | 52.1 | 33.9 | 3.7 |  | 2.3 | 19.3 | 46.6 | 31.7 |  | 36.0 | 34.5 | 4.5 | 25.0 | |
| Men | 2.284 |  | 9.4 | 48.0 | 38.5 | 4.2 |  | 2.2 | 22.2 | 41.1 | 34.5 |  | 34.5 | 15.1 | 34.7 | 15.6 | |
| **Colombia** |  |  |  |  |  |  |  |  |  |  |  |  |  |  |  |  |  | |
| Encuesta Nacional de Calidad de Vida (2017) | Women | 6.705 |  | 14.5 | 53.4 | 28.8 | 3.3 |  | 2.3 | 17.5 | 39.2 | 41.0 |  | 25.9 | 58.4 | 13.1 | 2.7 | |
| Men | 10.108 |  | 15.1 | 47.5 | 31.7 | 5.8 |  | 3.2 | 25.6 | 43.5 | 27.7 |  | 15.3 | 25.2 | 32.7 | 26.8 | |
| **Costa Rica** |  |  |  |  |  |  |  |  |  |  |  |  |  |  |  |  |  | |
| II Encuesta Centroamericana sobre Condiciones de Trabajo y Salud (2018) | Women | 497 |  | 10.9 | 51.1 | 34.8 | 3.0 |  | 1.2 | 33.8 | 47.1 | 17.7 |  | 8.9 | 39.4 | 23.7 | 27.8 | |
| Men | 1,006 |  | 8.5 | 44.8 | 37.2 | 9.3 |  | 7.1 | 50.5 | 33.2 | 9.2 |  | 8.1 | 12.0 | 48.6 | 31.3 | |
| **Ecuador** |  |  |  |  |  |  |  |  |  |  |  |  |  |  |  |  |  | |
| Encuesta Nacional de Salud y Nutrición (2012) | Women | 12.692 |  | 16.5 | 54.2 | 27.0 | 2.3 |  | 4.2 | 30.7 | 39.4 | 25.6 |  | 15.7 | 42.1 | 19.3 | 22.9 | |
| Men | 20.862 |  | 19.6 | 50.2 | 26.8 | 3.4 |  | 2.7 | 36.5 | 44.6 | 16.1 |  | 10.4 | 20.2 | 45.3 | 24.2 | |
| **El Salvador** |  |  |  |  |  |  |  |  |  |  |  |  |  |  |  |  |  | |
| II Encuesta Centroamericana sobre Condiciones de Trabajo y Salud (2018) | Women | 506 |  | 8.7 | 43.1 | 35.6 | 12.6 |  | 8.7 | 38.3 | 42.9 | 9.9 |  | 4.4 | 40.6 | 45.7 | 9.3 | |
| Men | 1,001 |  | 11.3 | 37.8 | 30.5 | 20.3 |  | 11.0 | 38.4 | 42.7 | 8.0 |  | 3.6 | 14.5 | 71.9 | 9.9 | |
| **Guatemala** |  |  |  |  |  |  |  |  |  |  |  |  |  |  |  |  |  | |
| II Encuesta Centroamericana sobre Condiciones de Trabajo y Salud (2018) | Women | 881 |  | 42.1 | 36.1 | 17.0 | 4.8 |  | 11.3 | 39.0 | 39.0 | 10.7 |  | 7.2 | 51.3 | 32.8 | 8.8 | |
| Men | 629 |  | 28.1 | 36.9 | 27.6 | 7.3 |  | 10.0 | 48.9 | 33.3 | 7.8 |  | 5.7 | 21.8 | 62.4 | 10.1 | |
| **Honduras** |  |  |  |  |  |  |  |  |  |  |  |  |  |  |  |  |  | |
| II Encuesta Centroamericana sobre Condiciones de Trabajo y Salud (2018) | Women | 728 |  | 28.1 | 45.5 | 22.7 | 3.7 |  | 5.3 | 48.9 | 36.6 | 9.2 |  | 6.7 | 35.9 | 36.8 | 20.7 | |
| Men | 779 |  | 23.4 | 40.0 | 26.4 | 10.2 |  | 8.7 | 57.4 | 29.2 | 4.8 |  | 6.4 | 11.0 | 64.0 | 18.3 | |
| **México** |  |  |  |  |  |  |  |  |  |  |  |  |  |  |  |  |  | |
| 6ta World Value Survey (2012) | Women | 338 |  | 16.6 | 60.4 | 21.0 | 2.1 |  | 1.5 | 24.6 | 53.0 | 21.0 |  |  |  |  |  | |
| Men | 658 |  | 18.1 | 54.6 | 23.1 | 4.3 |  | 2.7 | 20.5 | 55.9 | 20.8 |  |  |  |  |  | |
| **Nicaragua** |  |  |  |  |  |  |  |  |  |  |  |  |  |  |  |  |  | |
| II Encuesta Centroamericana sobre Condiciones de Trabajo y Salud (2018) | Women | 542 |  | 17.2 | 56.5 | 23.2 | 3.0 |  | 7.9 | 32.8 | 40.2 | 19.0 |  | 10.7 | 39.9 | 30.8 | 18.5 | |
| Men | 959 |  | 20.4 | 55.0 | 22.1 | 2.5 |  | 11.4 | 37.9 | 36.0 | 14.8 |  | 6.3 | 13.5 | 49.5 | 30.6 | |
| **Panamá** |  |  |  |  |  |  |  |  |  |  |  |  |  |  |  |  |  | |
| II Encuesta Centroamericana sobre Condiciones de Trabajo y Salud (2018) | Women | 502 |  | 15.9 | 52.2 | 28.9 | 2.8 |  | 0.6 | 15.7 | 51.8 | 31.9 |  | 16.9 | 44.6 | 19.7 | 18.5 | |
| Men | 1,003 |  | 16.9 | 45.1 | 32.4 | 5.6 |  | 5.4 | 24.6 | 55.8 | 14.1 |  | 7.2 | 13.5 | 58.4 | 20.7 | |
| **Perú** |  |  |  |  |  |  |  |  |  |  |  |  |  |  |  |  |  | |
| I Encuesta de Condiciones de Trabajo y Salud (2016) | Women | 1.442 |  | 22.8 | 47.5 | 23.1 | 6.3 |  | 6.6 | 17.2 | 40.5 | 35.7 |  | 17.9 | 51.1 | 8.2 | 22.9 | |
| Men | 1.663 |  | 20.6 | 44.7 | 26.6 | 8.5 |  | 4.3 | 14.6 | 44.2 | 37.5 |  | 21.3 | 29.1 | 36.9 | 12.7 | |
| **Puerto Rico** |  |  |  |  |  |  |  |  |  |  |  |  |  |  |  |  |  | |
| BRFSS Survey Data and Documentation (2017) | Women | 766 |  | 8.1 | 44.5 | 43.5 | 3.9 |  | - | 1.0 | 16.4 | 82.4 |  | - | - | - | - | |
| Men | 749 |  | 8.6 | 42.3 | 43.2 | 5.5 |  | 0.1 | 4.0 | 29.1 | 66.8 |  | - | - | - | - | |
| **Uruguay** |  |  |  |  |  |  |  |  |  |  |  |  |  |  |  |  |  | |
| Encuesta Nacional de Salud  (2014) | Women | 842 |  | 12.6 | 49.5 | 35.6 | 2.3 |  | 0.6 | 17.3 | 43.7 | 38.5 |  | 29.0 | 41.2 | 2.9 | 26.9 | |
| Men | 849 |  | 14.9 | 47.1 | 34.1 | 3.9 |  | 0.9 | 21.6 | 40.1 | 37.4 |  | 28.1 | 29.0 | 20.3 | 22.5 | |
| **LAC** | Women | 72,683 |  | 16.7 | 49.1 | 30.0 | 4.1 |  | 4.0 | 27.4 | 39.1 | 29.4 |  | 17.1 | 42.3 | 21.9 | 18.6 | |
|  | Men | 107,480 |  | 15.7 | 45.8 | 31.8 | 6.6 |  | 5.4 | 34.0 | 38.1 | 22.5 |  | 13.4 | 17.8 | 48.1 | 20.6 | |
| **Missing values** in education level (EL) and Occupational Categories (OC) : Brazil (EL 3.3%, OC 1.5%); Chile (EL 3.4%, OC 23.3%); Colombia (OC 3.7%); Ecuador (OC 0.6%); Uruguay (OC 0.6%) | | | | | | | | | | | | | | | | | |
| **Fuente: Argentina:**Instituto Nacional de Estadística y Censos https://www.indec.gob.ar/indec/web/Institucional-Indec-BasesDeDatos-2 **Brazil**:Instituto Brasileiro de Geografia e Estatística (IBEG) https://ww2.ibge.gov.br/home/estatistica/populacao/pns/2013/default.shtm **Chile**:Departamento de Epidemiología, ministerio de Salud http://epi.minsal.cl/condiciones-de-uso/Colombia:Dirección Nacional de Estadística http://microdatos.dane.gov.co/index.php/catalog/MICRODATOS **Costa Rica; El Salvador; Guatemala; Honduras; Nicaragua; Panma:**University of Texas, U.S.A.; Universidad Naional de Costa Rica: Available under request **Ecuador**:Instituto Nacional de Estadística Censos (INEC) http://www.ecuadorencifras.gob.ec/salud-salud-reproductiva-y-nutricion/ **México**:Institute for Comparative Survey Research http://www.worldvaluessurvey.org/WVSDocumentationWV6.jsp **Perú**:Instituto Nacional de Salud: Available under requestPuerto Rico:Center of Disease Control and Prevention https://www.cdc.gov/brfss/annual_data/annual_2017.html **Uruguay**:Encuesta Nacional de Salud http://www.msp.gub.uy/publicaci%C3%B3n/encuesta-nacional-de-salud | | | | | | | | | | | | | | | | | |

| **Supplementary Tabla B. Self-perceived health scale in surveys from 15 countries** | |  |  |  | | | | |  | |  | | | | |  |  | | |  | | |  | |  | |
| --- | --- | --- | --- | --- | --- | --- | --- | --- | --- | --- | --- | --- | --- | --- | --- | --- | --- | --- | --- | --- | --- | --- | --- | --- | --- | --- |
| **Country** | **Survey** | **Year** | **Question (original language)** | **Scale** | | | | | | | | | | | | | | | | | | | | **Scale (Original language)** | | |
| **Good health** | | | | | | | |  | | **Poor Health** | | | | | | | | | |
| Excellent | | Very good | | Good | | | |  | | Fair | | | | Poor | | | Very poor | | |
| Argentina | Encuesta nacional de Factores de Riesgo | 2013 | In general, you would say your health is ….. | | 1 | | 2 | | | 3 | | |  | | 4 | | | | 5 | | |  | | | | 1.Excelente 2. Muy buena 3. Buena 4. Regular 5. Mala | |
| Brazil | National Health Survey | 2013 | In general, how do you consider your health status to be? | |  | | 1 | | | 2 | | |  | | 3 | | | | 4 | | | 5 | | | | 1. Muito boa 2. Boa 3. Regular 4. Ruim 5. Muito ruim | |
| Chile | National Survey of Quality of Life | 2016 | In general, you would say your health is: | | 1 | | 2 | | | 3 | | |  | | 4 | | | | 5 | | |  | | | | 1.Excelente 2. Muy buena 3. Buena 4. Regular 5. Mala | |
| Colombia | National Survey of Quality of Life | 2017 | In general, the health status of "Name" is | |  | | 1 | | | 2 | | |  | | 3 | | | |  | | | 4 | | | | 1. Muy bueno 2. Bueno 3. Regular 4. Muy malo | |
| Costa Rica | II Central American Survey of Working Conditions and Health | 2018 | In general, how do you consider your health status to be? | |  | | 1 | | | 2 | | |  | | 3 | | | | 4 | | | 5 | | | | 1.Muy buena 2. Buena 3. Regular 4. Mala 5. Muy mala | |
| Ecuador | National Health and Nutrition Survey | 2012 | In general, you would say your health is: | | 1 | | 2 | | | 3 | | |  | | 4 | | | | 5 | | |  | | | | 1.Excelente 2. Muy buena 3. Buena 4. Regular 5. Mala | |
| El Salvador | II Central American Survey of Working Conditions and Health | 2018 | In general, how do you consider your health status to be? | |  | | 1 | | | 2 | | |  | | 3 | | | | 4 | | | 5 | | | | 1.Muy buena 2. Buena 3. Regular 4. Mala 5. Muy mala | |
| Guatemala | II Central American Survey of Working Conditions and Health | 2018 | In general, how do you consider your health status to be? | |  | | 1 | | | 2 | | |  | | 3 | | | | 4 | | | 5 | | | | 1.Muy buena 2. Buena 3. Regular 4. Mala 5. Muy mala | |
| Honduras | II Central American Survey of Working Conditions and Health | 2018 | In general, how do you consider your health status to be? | |  | | 1 | | | 2 | | |  | | 3 | | | | 4 | | | 5 | | | | 1.Muy buena 2. Buena 3. Regular 4. Mala 5. Muy mala | |
| México | 6ta World Value Survey | 2012 | In general, how would you describe your health today? | |  | | 1 | | | 2 | | |  | | 3 | | | | 4 | | |  | | | | 1. Muy bueno 2. Bueno 3. Regular 4. Malo | |
| Nicaragua | II Central American Survey of Working Conditions and Health | 2018 | In general, how do you consider your health status to be? | |  | | 1 | | | 2 | | |  | | 3 | | | | 4 | | | 5 | | | | 1.Muy buena 2. Buena 3. Regular 4. Mala 5. Muy mala | |
| Panamá | II Central American Survey of Working Conditions and Health | 2018 | In general, how do you consider your health status to be? | |  | | 1 | | | 2 | | |  | | 3 | | | | 4 | | | 5 | | | | 1.Muy buena 2. Buena 3. Regular 4. Mala 5. Muy mala | |
| Perú | I Encuesta de Condiciones de Trabajo y Salud | 2016 | In general, how do you consider your health status to be? | |  | | 1 | | | 2 | | |  | | 3 | | | | 4 | | | 5 | | | | 1.Muy buena 2. Buena 3. Regular 4. Mala 5. Muy mala | |
| Puerto Rico | BRFSS Survey Data and Documentation | 2017 | In general, you would say your health is: | | 1 | | 2 | | | 3 | | |  | | 4 | | | | 5 | | |  | | | | 1.Excelente 2. Muy buena 3. Buena 4. Regular 5. Mala | |
| Uruguay | National Health Survey | 2014 | In general, you would say your health is: | | 1 | | 2 | | | 3 | | |  | | 4 | | | | 5 | | |  | | | | 1.Excelente 2. Muy buena 3. Buena 4. Regular 5. Mala | |

| | **Supplementary Table C. Prevalence of poor self-perceived health (%) and 95% confidence interval** | | | |  |  |  |  |  |  | | --- | --- | --- | --- | --- | --- | --- | --- | --- | --- | |  |  |  |  |  |  |  |  |  |  | |  |  | **Argentina** | **Brasil** | **Chile** | **Colombia** | **Costa Rica** | **Ecuador** | **El Salvador** | **Guatemala** | |  |  | **%(IC95%)** | **%(IC95%)** | **%(IC95%)** | **%(IC95%)** | **%(IC95%)** | **%(IC95%)** | **%(IC95%)** | **%(IC95%)** | | **Women** | | 17,9 (17 to 18,9) | 25.3 (24.8 to 25.7) | 26,9 (24,5 to 29,2) | 18,2 (17,3 to 19,1) | 27,8 (23,8 to 31,7) | 39,1 (38,3 to 40) | 31.4 (27.4 to 35.5) | 19,6 (16,5 to 22,7) | | **Age groups** | |  |  |  |  |  |  |  |  | |  | < 25 | 7,5 (5,9 to 9,1) | 14.5 (13.7 to 15.4) | 5 (1,2 to 8,7) | 10,4 (8,4 to 12,3) | 11,1 (2,7 to 19,5) | 26,6 (24,6 to 28,6) | 11.4 (2 to 20.7) | 15,5 (11,1 to 19,8) | |  | 25-44 | 14,1 (12,8 to 15,4) | 21.1 (20.6 to 21.7) | 22,7 (19,7 to 25,8) | 13,7 (12,5 to 14,8) | 21,3 (16,2 to 26,3) | 37 (35,8 to 38,1) | 26.1 (20.3 to 32) | 15,4 (10,7 to 20,1) | |  | 45-64 | 26,7 (24,7 to 28,8) | 36.7 (35.9 to 37.6) | 37,9 (33,5 to 42,3) | 27,6 (25,6 to 29,6) | 41 (33,7 to 48,4) | 48,3 (46,6 to 50) | 35.6 (28.6 to 42.5) | 33,6 (24,7 to 42,6) | |  | >65 | 29,8 (29,7 to 39,8) | 45.3 (41.7 to 48.8) | 35,6 (25,7 to 52,4) | 35,2 (35,5 to 48,4) | 46,7 (21,4 to 71,9) | 53,4 (55,8 to 67) | 51.6 (39.3 to 63.8) | 36,7 (19,4 to 53,9) | | **Educational level** | |  |  |  |  |  |  |  |  | |  | High | 9,4 (8,1 to 10,6) | 12.9 (12.2 to 13.5) | 19,3 (15,5 to 23,1) | 10,3 (9,1 to 11,4) | 20,5 (53,5 to 113,2) | 26,1 (24,6 to 27,6) | 24 (39.8 to 69.3) | 11,9 (25,4 to 47,8) | |  | Middle | 18 (16 to 19,9) | 21.9 (21.3 to 22.6) | 26,8 (23,3 to 30,3) | 18,5 (17 to 20) | 25,6 (25,6 to 39,8) | 39,8 (38,4 to 41,2) | 24.9 (28.8 to 42.3) | 17,1 (13,5 to 23,2) | |  | Low | 23,4 (21,5 to 25,2) | 40.2 (39.2 to 41.1) | 36,7 (30,7 to 42,6) | 34,8 (32,1 to 37,5) | 32,7 (20 to 31,2) | 47,4 (45,9 to 49) | 35.6 (19.1 to 30.6) | 18,4 (12,4 to 21,9) | |  | >Low | 34,2 (29,6 to 38,7) | 64.4 (59.9 to 68.8) | 34,6 (17,8 to 51,5) | 28,8 (21,7 to 36) | 83,3 (12 to 28,9) | 52,1 (47,9 to 56,2) | 54.5 (12.2 to 35.8) | 36,6 (4,2 to 19,7) | | **Occupational categories** | |  |  |  |  |  |  |  |  | |  | Non-manual skilled | - | 14.5 (13.8 to 15.2) | 20 (15,9 to 24,1) | 10,6 (9,2 to 12,1) | 13,6 (3,5 to 23,8) | 25,8 (23,9 to 27,7) | 36.4 (16.3 to 56.5) | 13,3 (3,4 to 23,3) | |  | Non-nanual non-skilled | - | 23.0 (22.3 to 23.7) | 29 (24,2 to 33,8) | 20,1 (18,9 to 21,4) | 28,6 (22,2 to 34,9) | 39,7 (38,4 to 41) | 26.8 (20.8 to 32.9) | 16,1 (12,1 to 20,2) | |  | Manual skilled | - | 36.1 (34.7 to 37.5) | 29,4 (16,1 to 42,7) | 28,3 (25,2 to 31,3) | 32,2 (23,8 to 40,6) | 42,7 (40,8 to 44,7) | 33.3 (27.3 to 39.4) | 27,2 (21,1 to 33,3) | |  | Manual non-skilled | - | 36.4 (35.4 to 37.4) | 31,4 (25,6 to 37,1) | 19,1 (13,3 to 25) | 27,5 (20,1 to 35) | 44,5 (42,7 to 46,3) | 40.4 (26.4 to 54.5) | 12,7 (3,9 to 21,5) | | **Men** | | 14,1 (13,5 to 14,7) | 22.3 (21.9 to 22.6) | 14,5 (13,1 to 15,9) | 13,4 (12,8 to 14,1) | 25,5 (22,9 to 28,2) | 33,7 (33 to 34,3) | 26.8 (24 to 29.5) | 24,3 (21,5 to 27,1) | | **Age groups** | |  |  |  |  |  |  |  |  | |  | < 25 | 5,6 (4,5 to 6,6) | 11.6 (10.9 to 12.3) | 7 (3,4 to 10,5) | 5,6 (4,4 to 6,8) | 16,3 (8,5 to 24,1) | 22,8 (21,5 to 24,2) | 11.5 (5.6 to 17.4) | 18,5 (13,7 to 23,4) | |  | 25-44 | 10,4 (9,7 to 11,1) | 17.5 (17 to 18) | 9,7 (8 to 11,5) | 9,3 (8,5 to 10,2) | 16,6 (13,2 to 20,1) | 31,3 (30,4 to 32,1) | 21.2 (17 to 25.3) | 17,5 (13,4 to 21,7) | |  | 45-64 | 21,2 (20 to 22,4) | 33 (32.3 to 33.8) | 19,8 (17,2 to 22,5) | 18,9 (17,5 to 20,2) | 35,8 (31 to 40,7) | 42,5 (41,2 to 43,8) | 26.2 (21.3 to 31.2) | 32,5 (26,6 to 38,4) | |  | >65 | 29,8 (26,4 to 33,2) | 43.4 (41.1 to 45.7) | 35,6 (26,1 to 45,2) | 35,2 (31,4 to 39,1) | 35,1 (25,5 to 44,8) | 53,4 (49,8 to 57) | 45.8 (39 to 52.7) | 50 (37,8 to 62,3) | | **Educational level** | |  |  |  |  |  |  |  |  | |  | High | 6,5 (5,8 to 7,3) | 10.5 (9.9 to 11.1) | 6 (4,3 to 7,7) | 5,8 (4,9 to 6,6) | 9,7 (52,2 to 74,6) | 20,3 (19 to 21,6) | 10 (28.2 to 46.3) | 7,2 (14 to 31,5) | |  | Middle | 11,2 (10,2 to 12,1) | 16.3 (15.7 to 16.8) | 15,7 (13,3 to 18,1) | 10,7 (9,8 to 11,6) | 18,6 (23,9 to 31,6) | 31,5 (30,5 to 32,5) | 23.2 (26.6 to 35.9) | 16 (28,5 to 37,4) | |  | Low | 19,8 (18,7 to 20,9) | 31.1 (30.5 to 31.8) | 23,4 (19,7 to 27,2) | 25,1 (23,4 to 26,8) | 27,8 (14,4 to 22,7) | 42,2 (41,1 to 43,3) | 31.3 (19.2 to 27.2) | 32,9 (11,8 to 20,2) | |  | >Low | 32,2 (29,1 to 35,2) | 48 (44.5 to 51.4) | 13,9 (4,2 to 23,5) | 24,1 (19,5 to 28,6) | 63,4 (3,7 to 15,7) | 52,7 (48,6 to 56,8) | 37.3 (3.4 to 16.6) | 22,7 (1,1 to 13,4) | | **Occupational categories** | |  |  |  |  |  |  |  |  | |  | Non-manual skilled | - | 12.7 (12.1 to 13.3) | 8,1 (6 to 10,3) | 6,3 (5 to 7,5) | 13,6 (6,1 to 21) | 20,5 (18,9 to 22,2) | 11.1 (0.8 to 21.4) | 6 (-0,6 to 12,6) | |  | Non-nanual non-skilled | - | 20.3 (19.5 to 21.1) | 7,6 (4,4 to 10,8) | 11,3 (10,1 to 12,6) | 17,4 (10,6 to 24,1) | 29,5 (28,1 to 30,8) | 32.4 (24.8 to 40) | 13 (8,3 to 17,8) | |  | Manual skilled | - | 25.7 (25.1 to 26.3) | 19,7 (16,6 to 22,8) | 19,9 (18,5 to 21,3) | 33,7 (29,6 to 37,9) | 36 (35 to 36,9) | 25.6 (22.4 to 28.7) | 30 (26,2 to 33,8) | |  | Manual non-skilled | - | 30.3 (29.3 to 31.3) | 23,1 (18,2 to 28,1) | 13,5 (12,2 to 14,8) | 19 (14,7 to 23,4) | 39,6 (38,2 to 40,9) | 32.3 (23.1 to 41.5) | 23,6 (14,8 to 32,4) | |  |  |  |  |  |  |  |  |  |  | |  |  |  | **Honduras** | **Mexico** | **Nicaragua** | **Panama** | **Peru** | **Puerto Rico** | **Uruguay** | |  |  |  | **%(IC95%)** | **%(IC95%)** | **%(IC95%)** | **%(IC95%)** | **%(IC95%)** | **%(IC95%)** | **%(IC95%)** | | **Women** | |  | 43,2 (39,3 to 47) | 24.0 (19,4 to 28,5) | 48.0 (43,8 to 52,2) | 30,1 (26,1 to 34,1) | 43,8 (41,3 to 46,4) | 24,5 (21,5 to 27,6) | 15,2 (12,8 to 17,6) | | **Age groups** | |  |  |  |  |  |  |  |  | |  | < 25 |  | 35,4 (28,4 to 42,3) | 10,7 (2,6 to 18,8) | 35,5 (25,8 to 45,2) | 13,8 (6,2 to 21,3) | 29,3 (24,4 to 34,2) | 6,5 (0,3 to 12,6) | 4,8 (0,7 to 8,9) | |  | 25-44 |  | 38,6 (33 to 44,1) | 20,6 (15 to 26,1) | 45,1 (39,5 to 50,7) | 27,9 (22,4 to 33,3) | 39 (35,3 to 42,6) | 20,5 (16,2 to 24,8) | 14,4 (11,1 to 17,8) | |  | 45-64 |  | 56,2 (48,1 to 64,2) | 38 (26,7 to 49,3) | 60,3 (51,8 to 68,9) | 38,6 (30,7 to 46,5) | 55,1 (49,7 to 60,4) | 30,3 (25,4 to 35,3) | 19,5 (15 to 24) | |  | >65 |  | 79,2 (62,9 to 95,4) | 46,4 (59,8 to 111,6) | 75 (53,8 to 96,2) | 71,4 (47,8 to 95,1) | 55,5 (81,1 to 94,5) | 31,7 (25,6 to 61,1) | 10,6 (3,3 to 40,1) | | **Educational level** | |  |  |  |  |  |  |  |  | |  | High |  | 20,3 (42,3 to 75,4) | 9,9 (2,9 to 16,8) | 33.0 (50,9 to 79,4) | 25,6 (13,3 to 120) | 32,1 (28,1 to 36,2) | 21,9 (18,6 to 25,1) | 9,3 (6,1 to 12,5) | |  | Middle |  | 30,9 (49,4 to 60,4) | 19,6 (13,7 to 25,4) | 44 (50 to 64,6) | 25 (43,4 to 65,4) | 41,6 (37,6 to 45,6) | 34,9 (26,6 to 43,2) | 15,9 (12,2 to 19,7) | |  | Low |  | 54,9 (25 to 36,8) | 42,2 (31,5 to 52,8) | 57,3 (37,4 to 50,6) | 54,4 (19,7 to 30,3) | 59,4 (53,3 to 65,5) | 62,5 (29 to 96) | 26,1 (18,9 to 33,2) | |  | >Low |  | 58,8 (10,1 to 30,6) | 80 (44,9 to 115,1) | 65,1 (23,9 to 42,1) | 66,7 (18,9 to 32,4) | 77,9 (69,5 to 86,2) | - | 26,9 (-12,4 to 66,3) | | **Occupational categories** | |  |  |  |  |  |  |  |  | |  | Non-manual skilled |  | 37,2 (22,8 to 51,7) | 6,7 (-0,6 to 14) | 37,9 (25,4 to 50,4) | 24,7 (15,5 to 33,9) | 28,1 (22,6 to 33,6) | - | 9,7 (6 to 13,4) | |  | Non-nanual non-skilled |  | 42,9 (36,5 to 49,2) | 16,3 (5,2 to 27,3) | 44,9 (38,3 to 51,5) | 23,7 (18,1 to 29,2) | 41,5 (37,9 to 45) | - | 12,8 (9,3 to 16,3) | |  | Manual skilled |  | 43,9 (37,6 to 50,2) | 19 (10,7 to 27,4) | 59,9 (52,4 to 67,3) | 43,4 (33,7 to 53,2) | 52,3 (43,3 to 61,3) | - | 15 (0,8 to 29,2) | |  | Manual non-skilled |  | 44,4 (35,9 to 52,8) | 33,1 (25,9 to 40,4) | 40 (30,4 to 49,6) | 35,5 (25,8 to 45,2) | 57,8 (52,5 to 63,1) | - | 24,8 (19,2 to 30,4) | | **Men** | |  | 43,8 (40,5 to 47,1) | 22,9 (19,7 to 26,2) | 43,4 (40,2 to 46,5) | 22,9 (20,3 to 25,5) | 34,4 (32,1 to 36,7) | 18,2 (15,4 to 20,9) | 9,2 (7,3 to 11,1) | | **Age groups** | |  |  |  |  |  |  |  |  | |  | < 25 |  | 18,8 (13,4 to 24,2) | 18,5 (11,5 to 25,5) | 27,6 (21,3 to 33,8) | 11,8 (6,9 to 16,6) | 20,6 (16,3 to 24,9) | 7,7 (1,2 to 14,2) | 7,4 (2,8 to 11,9) | |  | 25-44 |  | 38,8 (33,7 to 44) | 17 (13,1 to 20,9) | 41,7 (37,5 to 46) | 16,4 (13 to 19,8) | 29,7 (26,4 to 33) | 12,6 (8,9 to 16,2) | 6,4 (4 to 8,8) | |  | 45-64 |  | 61,4 (55,1 to 67,7) | 36,2 (28,5 to 43,8) | 59 (52,3 to 65,6) | 32 (26,9 to 37,1) | 46,4 (41,7 to 51) | 24 (19,4 to 28,6) | 13,6 (9,7 to 17,6) | |  | >65 |  | 75 (66 to 84) | 46,4 (28 to 64,9) | 70,8 (52,6 to 89) | 57,1 (44,2 to 70,1) | 55,5 (47,3 to 63,7) | 31,7 (17,5 to 46) | 10,6 (0,1 to 21,1) | | **Educational level** | |  |  |  |  |  |  |  |  | |  | High |  | 26,8 (51,7 to 73,6) | 10,9 (5,7 to 16,2) | 31,7 (47,6 to 66,2) | 16,3 (27,6 to 53,8) | 26 (22,5 to 29,4) | 12,5 (9,7 to 15,4) | 6,9 (4,1 to 9,7) | |  | Middle |  | 24,2 (47,9 to 56,7) | 20,7 (16,5 to 24,8) | 37,1 (44,7 to 55) | 16,1 (32 to 44,1) | 34,2 (30,8 to 37,7) | 27,9 (21,9 to 33,8) | 8,5 (5,6 to 11,5) | |  | Low |  | 52,3 (18,9 to 29,5) | 38,5 (30,3 to 46,7) | 49,9 (32 to 42,2) | 38,1 (13 to 19,1) | 47,2 (40,9 to 53,5) | 36,7 (19,4 to 53,9) | 13,3 (8,4 to 18,2) | |  | >Low |  | 62,7 (13,3 to 40,4) | 44,4 (21,5 to 67,4) | 56,9 (24 to 39,3) | 40,7 (10,2 to 22,4) | 64 (52,9 to 75,2) | - | 34 (1 to 67) | | **Occupational categories** | |  |  |  |  |  |  |  |  | |  | Non-manual skilled |  | 23,6 (12,4 to 34,9) | 18,2 (10,1 to 26,2) | 30 (18,4 to 41,6) | 16,7 (8,1 to 25,3) | 24,7 (20,2 to 29,2) | - | 5,8 (2,9 to 8,8) | |  | Non-nanual non-skilled |  | 33,7 (24,2 to 43,2) | 16,2 (7,4 to 24,9) | 36,4 (28,1 to 44,7) | 25,2 (17,9 to 32,5) | 29,6 (25,6 to 33,7) | - | 8,4 (5 to 11,9) | |  | Manual skilled |  | 47,1 (42,9 to 51,3) | 28,4 (21,9 to 34,9) | 45,3 (40,8 to 49,7) | 24,1 (20,6 to 27,5) | 40,9 (37 to 44,8) | - | 7,5 (3,6 to 11,4) | |  | Manual non-skilled |  | 45,6 (37,8 to 53,3) | 22,5 (17,9 to 27,2) | 46,1 (40,4 to 51,8) | 20,2 (14,7 to 25,6) | 42,8 (36,1 to 49,5) | - | 16,1 (10,9 to 21,4) | |  |  |  |  |  |  |
| --- | --- | --- | --- | --- | --- | --- | --- | --- | --- | --- | --- | --- | --- | --- | --- | --- | --- | --- | --- | --- | --- | --- | --- | --- | --- | --- | --- | --- | --- | --- | --- | --- | --- | --- | --- | --- | --- | --- | --- | --- | --- | --- | --- | --- | --- | --- | --- | --- | --- | --- | --- | --- | --- | --- | --- | --- | --- | --- | --- | --- | --- | --- | --- | --- | --- | --- | --- | --- | --- | --- | --- | --- | --- | --- | --- | --- | --- | --- | --- | --- | --- | --- | --- | --- | --- | --- | --- | --- | --- | --- | --- | --- | --- | --- | --- | --- | --- | --- | --- | --- | --- | --- | --- | --- | --- | --- | --- | --- | --- | --- | --- | --- | --- | --- | --- | --- | --- | --- | --- | --- | --- | --- | --- | --- | --- | --- | --- | --- | --- | --- | --- | --- | --- | --- | --- | --- | --- | --- | --- | --- | --- | --- | --- | --- | --- | --- | --- | --- | --- | --- | --- | --- | --- | --- | --- | --- | --- | --- | --- | --- | --- | --- | --- | --- | --- | --- | --- | --- | --- | --- | --- | --- | --- | --- | --- | --- | --- | --- | --- | --- | --- | --- | --- | --- | --- | --- | --- | --- | --- | --- | --- | --- | --- | --- | --- | --- | --- | --- | --- | --- | --- | --- | --- | --- | --- | --- | --- | --- | --- | --- | --- | --- | --- | --- | --- | --- | --- | --- | --- | --- | --- | --- | --- | --- | --- | --- | --- | --- | --- | --- | --- | --- | --- | --- | --- | --- | --- | --- | --- | --- | --- | --- | --- | --- | --- | --- | --- | --- | --- | --- | --- | --- | --- | --- | --- | --- | --- | --- | --- | --- | --- | --- | --- | --- | --- | --- | --- | --- | --- | --- | --- | --- | --- | --- | --- | --- | --- | --- | --- | --- | --- | --- | --- | --- | --- | --- | --- | --- | --- | --- | --- | --- | --- | --- | --- | --- | --- | --- | --- | --- | --- | --- | --- | --- | --- | --- | --- | --- | --- | --- | --- | --- | --- | --- | --- | --- | --- | --- | --- | --- | --- | --- | --- | --- | --- | --- | --- | --- | --- | --- | --- | --- | --- | --- | --- | --- | --- | --- | --- | --- | --- | --- | --- | --- | --- | --- | --- | --- | --- | --- | --- | --- | --- | --- | --- | --- | --- | --- | --- | --- | --- | --- | --- | --- | --- | --- | --- | --- | --- | --- | --- | --- | --- | --- | --- | --- | --- | --- | --- | --- | --- | --- | --- | --- | --- | --- | --- | --- | --- | --- | --- | --- | --- | --- | --- | --- | --- | --- | --- | --- | --- | --- | --- | --- | --- | --- | --- | --- | --- | --- | --- | --- | --- | --- | --- | --- | --- | --- | --- | --- | --- | --- | --- | --- | --- | --- | --- | --- | --- | --- | --- | --- | --- | --- | --- | --- | --- | --- | --- | --- | --- | --- | --- | --- | --- | --- | --- | --- | --- | --- | --- | --- | --- | --- | --- | --- | --- | --- | --- | --- | --- | --- | --- | --- | --- | --- | --- | --- | --- | --- | --- | --- | --- | --- | --- | --- | --- | --- | --- | --- | --- | --- | --- | --- | --- | --- | --- | --- | --- | --- | --- | --- | --- | --- | --- | --- | --- | --- | --- | --- | --- | --- | --- | --- | --- | --- | --- | --- | --- | --- | --- | --- | --- | --- | --- | --- | --- | --- | --- | --- | --- | --- | --- | --- | --- | --- | --- | --- | --- | --- | --- | --- | --- | --- | --- | --- | --- | --- | --- | --- | --- | --- | --- | --- | --- | --- | --- | --- | --- | --- | --- | --- | --- | --- | --- | --- | --- | --- | --- | --- | --- | --- | --- | --- | --- | --- | --- | --- | --- | --- | --- | --- | --- | --- | --- | --- | --- | --- | --- | --- | --- | --- | --- | --- | --- | --- | --- | --- | --- | --- | --- | --- | --- | --- | --- | --- | --- | --- | --- | --- | --- | --- | --- | --- | --- | --- | --- | --- | --- | --- | --- | --- | --- | --- | --- | --- | --- | --- | --- | --- | --- | --- | --- | --- | --- | --- | --- | --- | --- | --- | --- | --- | --- | --- | --- | --- | --- | --- | --- | --- | --- | --- | --- | --- | --- | --- | --- | --- | --- | --- | --- | --- | --- | --- | --- | --- | --- | --- | --- | --- | --- | --- | --- | --- | --- | --- | --- | --- | --- | --- | --- | --- | --- | --- | --- | --- | --- | --- | --- | --- | --- | --- | --- | --- | --- | --- | --- | --- | --- | --- | --- | --- | --- | --- | --- | --- | --- | --- | --- | --- | --- | --- | --- | --- | --- | --- | --- | --- | --- | --- | --- | --- | --- | --- | --- | --- |

| | **Supplementary table D. Prevalence of poor self-perceived health (%) and Kuznets relative index with 95% confidence interval** | | | | | | | | | | | | | | | | | | | --- | --- | --- | --- | --- | --- | --- | --- | --- | --- | --- | --- | --- | --- | --- | --- | --- | --- | |  |  |  |  |  |  |  |  |  |  |  |  |  |  |  |  |  |  | |  |  | **Argentina** | | **Brasil** | | **Chile** | | **Colombia** | | **Costa Rica** | | **Ecuador** | | **El Salvador** | | **Guatemala** | | |  |  | **%** | **Kzt (CI 95%)** | **%** | **Kzt (CI 95%)** | **%** | **Kzt (CI 95%)** | **%** | **Kzt (CI 95%)** | **%** | **Kzt (CI 95%)** | **%** | **Kzt (CI 95%)** | **%** | **Kzt (CI 95%)** | **%** | **Kzt (CI 95%)** | | **Women** | | 17.9 |  | 25.0 |  | 26.9 |  | 18.2 |  | 27.8 |  | 39.1 |  | 31.4 |  | 19.6 |  | | **Age groups** | |  |  |  |  |  |  |  |  |  |  |  |  |  |  |  |  | |  | < 25 | 7.5 | **1** | 14.5 | **1** | 4.5 | **1** | 12.2 | **1** | 11.1 | **1** | 27.1 | **1** | 11.4 | **1** | 15.5 | **1** | |  | 25-44 | 14.1 | 1,9 (1,5 - 2,4) | 21.1 | 1.5 (1.4 - 1.6) | 22.7 | 4,6 (2,1 - 9,9) | 15.2 | 1,3 (1,1 - 1,6) | 21.3 | 1.9 (0.9 - 4.2) | 37.0 | 1,4 (1,3 - 1,5) | 26.1 | 2.3 (1 - 5.4) | 15.4 | 1 (0.7 - 1.5) | |  | 45-64 | 26.7 | 3,6 (2,8 - 4,5) | 36.7 | 2.5 (2.4 - 2.7) | 37.9 | 7,6 (3,6 - 16,4) | 29.6 | 2,7 (2,2 - 3,3) | 41.0 | 3.7 (1.7 - 8) | 48.3 | 1,8 (1,7 - 2) | 35.6 | 3.1 (1.3 - 7.3) | 33.6 | 2.2 (1.5 - 3.2) | |  | >65 | 34.8 | 4,6 (3,6 - 6) | 45.3 | 3.1 (2.8 - 3.4) | 39.1 | 7,9 (3,4 - 18,1) | 49.4 | 4 (3,2 - 5,2) | 46.7 | 4.2 (1.7 - 10.6) | 61.4 | 2,3 (2 - 2,6) | 51.6 | 4.5 (1.9 - 10.7) | 36.7 | 2.4 (1.4 - 4.1) | | **Educational level** | |  |  |  |  |  |  |  |  |  |  |  |  |  |  |  |  | |  | High | 9.4 | **1** | 12.8 | **1** | 19.3 | **1** | 11.5 | **1** | 20.5 | **1** | 26.1 | **1** | 24.0 | **1** | 11.9 | **1** | |  | Middle | 18.0 | 1,7 (1,5 - 2,1) | 21.5 | 1.7 (1.6 - 1.8) | 26.8 | 1.5 (1.4 - 1.6) | 19.4 | 1,8 (1,6 - 2,1) | 25.6 | 1.3 (0.8 - 2) | 39.3 | 1,5 (1,4 - 1,6) | 24.9 | 1 (0.6 - 1.8) | 17.1 | 1.4 (0.7 - 2.9) | |  | Low | 23.4 | 2,8 (2,4 - 3,3) | 39.8 | 3.1 (3.0 - 3.3) | 36.7 | 2.9 (2.8 - 3.1) | 37.4 | 3,4 (3 - 3,9) | 32.7 | 1.6 (1 - 2.5) | 47.4 | 1,8 (1,7 - 1,9) | 35.6 | 1.5 (0.9 - 2.5) | 18.4 | 1.5 (0.8 - 3.1) | |  | >Low | 34.2 | 4,4 (3,6 - 5,3) | 63.6 | 5 (4.6 - 5.4) | 34.6 | 4.6 (4.2 - 5) | 38.7 | 2,8 (2,1 - 3,7) | 83.3 | 4.1 (2.4 - 7) | 52.0 | 2 (1,8 - 2,2) | 54.5 | 2.3 (1.3 - 4) | 36.6 | 3.1 (1.5 - 6.3) | | **Occupational categories** | | |  |  |  |  |  |  |  |  |  |  |  |  |  |  |  | |  | Non-manual skilled | - | - | 14.5 | **1** | 20.0 | **1** | 11.9 | **1** | 13.6 | **1** | 25.8 | **1** | 36.4 | **1** | 13.3 | **1** | |  | Non-nanual non-skilled | - | - | 22.6 | 1.6 (1.5 - 1.7) | 29.0 | 1,5 (1,1 - 1,9) | 22.6 | 1,9 (1,6 - 2,2) | 28.6 | 2.1 (1 - 4.6) | 39.8 | 1,5 (1,4 - 1,7) | 26.8 | 0.7 (0.4 - 1.3) | 16.1 | 1.2 (0.6 - 2.7) | |  | Manual skilled | - | - | 36.0 | 2.5 (2.3 - 2.6) | 29.4 | 1,5 (0,9 - 2,4) | 30.9 | 2,7 (2,2 - 3,2) | 32.2 | 2.4 (1.1 - 5.2) | 42.3 | 1,6 (1,5 - 1,8) | 33.3 | 0.9 (0.5 - 1.6) | 27.2 | 2 (0.9 - 4.4) | |  | Manual non-skilled | - | - | 36.0 | 2.5 (2.4 - 2.7) | 31.4 | 1,6 (1,2 - 2,1) | 24.3 | 1,8 (1,3 - 2,5) | 27.5 | 2 (0.9 - 4.5) | 43.7 | 1,7 (1,6 - 1,8) | 40.4 | 1.1 (0.6 - 2.1) | 12.7 | 1 (0.3 - 2.6) | | **Men** | | 14.1 |  | 22.0 |  | 14.5 |  | 13.4 |  | 25.5 |  | 33.7 |  | 26.8 |  | 24.3 |  | | **Age groups** | |  |  |  |  |  |  |  |  |  |  |  |  |  |  |  |  | |  | < 25 | 6.7 | **1** | 11.5 | **1** | 6.4 | **1** | 6.1 | **1** | 16.3 | **1** | 22.4 | **1** | 11.5 | **1** | 18.5 | **1** | |  | 25-44 | 10.4 | 1,9 (1,5 - 2,3) | 17.5 | 1.5 (1.4 - 1.6) | 9.7 | 1,4 (0,8 - 2,4) | 10.6 | 1,7 (1,3 - 2,1) | 16.6 | 1 (0.6 - 1.7) | 31.3 | 1,4 (1,3 - 1,5) | 21.2 | 1.8 (1.1 - 3.2) | 17.5 | 0.9 (0.7 - 1.3) | |  | 45-64 | 22.0 | 3,8 (3,1 - 4,6) | 33.0 | 2.8 (2.7 - 3) | 19.8 | 2,8 (1,7 - 4,8) | 21.5 | 3,4 (2,7 - 4,3) | 35.8 | 2.2 (1.3 - 3.6) | 42.5 | 1,9 (1,8 - 2) | 26.2 | 2.3 (1.3 - 3.9) | 32.5 | 1.8 (1.3 - 2.4) | |  | >65 | 28.4 | 5,4 (4,3 - 6,7) | 43.4 | 3.7 (3.5 - 4.1) | 35.6 | 5,1 (2,9 - 9,1) | 38.9 | 6,3 (4,9 - 8,1) | 35.1 | 2.2 (1.2 - 3.7) | 53.4 | 2,4 (2,2 - 2,6) | 45.8 | 4 (2.3 - 6.8) | 50.0 | 2.7 (1.9 - 3.9) | | **Educational level** | |  |  |  |  |  |  |  |  |  |  |  |  |  |  |  |  | |  | High | 6.9 | **1** | 10.4 | **1** | 6.0 | **1** | 7.0 | **1** | 9.7 | **1** | 20.3 | **1** | 10.0 | **1** | 7.2 | **1** | |  | Middle | 11.3 | 1,7 (1,5 - 2) | 15.9 | 1.6 (1.5 - 1.7) | 15.7 | 2,3 (1,1 - 4,9) | 12.1 | 1,8 (1,6 - 2,2) | 18.6 | 1.9 (1 - 3.7) | 29.5 | 1,5 (1,4 - 1,6) | 23.2 | 2.3 (1.2 - 4.6) | 16.0 | 2.2 (0.9 - 5.4) | |  | Low | 20.4 | 3 (2,7 - 3,4) | 30.7 | 3.0 (2.8 - 3.2) | 23.4 | 3,9 (2,8 - 5,4) | 26.1 | 4,3 (3,7 - 5,1) | 27.8 | 2.9 (1.5 - 5.4) | 42.2 | 2,1 (1,9 - 2,2) | 31.3 | 3.1 (1.6 - 6.1) | 32.9 | 4.5 (1.9 - 10.7) | |  | >Low | 30.6 | 4,9 (4,2 - 5,7) | 47.7 | 4.6 (4.2 - 5.0) | 13.9 | 2,3 (1,1 - 4,9) | 28.9 | 4,2 (3,3 - 5,3) | 63.4 | 6.5 (3.4 - 12.5) | 52.5 | 2,6 (2,3 - 2,9) | 37.3 | 3.7 (1.8 - 7.5) | 22.7 | 3.1 (1.2 - 7.9) | | **Occupational categories** | | |  |  |  |  |  |  |  |  |  |  |  |  |  |  |  | |  | Non-manual skilled | - | - | 12.6 | **1** | 8.1 | **1** | 8.0 | **1** | 13.6 | **1** | 20.5 | **1** | 11.1 | **1** | 6.0 | **1** | |  | Non-nanual non-skilled | - | - | 20.0 | 1.6 (1.5 - 1.7) | 7.6 | 0,9 (0,6 - 1,5) | 13.8 | 1,8 (1,4 - 2,3) | 17.4 | 1.3 (0.7 - 2.5) | 29.6 | 1,4 (1,3 - 1,6) | 32.4 | 2.9 (1.1 - 7.6) | 13.0 | 2.2 (0.7 - 6.9) | |  | Manual skilled | - | - | 25.4 | 2.0 (1.9 - 2.1) | 19.7 | 2,4 (1,8 - 3,3) | 21.0 | 3,2 (2,6 - 3,9) | 33.7 | 2.5 (1.4 - 4.4) | 35.6 | 1,7 (1,6 - 1,9) | 25.6 | 2.3 (0.9 - 5.8) | 30.0 | 5 (1.7 - 15.1) | |  | Manual non-skilled | - | - | 29.3 | 2.4 (2.3 - 2.5) | 23.1 | 2,8 (2 - 4) | 14.7 | 2,2 (1,7 - 2,7) | 19.0 | 1.4 (0.8 - 2.5) | 38.3 | 1,9 (1,7 - 2) | 32.3 | 2.9 (1.1 - 7.7) | 23.6 | 3.9 (1.2 - 12.5) | |  |  |  |  |  |  |  |  |  |  |  |  |  |  |  |  |  |  | | **Continue… Supplementary Table D. Prevalence of poor self-perceived health (%) and Kuznets relative index with 95% confidence interval** | | | | | | | | | |  |  |  |  |  |  |  |  | |  |  |  |  |  |  |  |  |  |  |  |  |  |  |  |  |  |  | |  |  |  | | **Mexico** | | **Honduras** | | **Nicaragua** | | **Panama** | | **Peru** | | **Puerto Rico** | | **Uruguay** |  | |  |  |  |  | **%** | **Kzt (CI 95%)** | **%** | **Kzt (CI 95%)** | **%** | **Kzt (CI 95%)** | **%** | **Kzt (CI 95%)** | **%** | **Kzt (CI 95%)** | **%** | **Kzt (CI 95%)** | **%** | **Kzt (CI 95%)** | | **Women** | |  |  | 24.0 |  | 43.2 |  | 48.0 |  | 30.1 |  | 43.7 |  | 24.5 |  | 15.2 |  | | **Age groups** | |  |  |  |  |  |  |  |  |  |  |  |  |  |  |  |  | |  | < 25 |  |  | 10.7 | **1** | 35.4 | **1** | 35.5 | **1** | 13.8 | **1** | 29.3 | **1** | 6.5 | **1** | 4.8 | **1** | |  | 25-44 |  |  | 20.6 | 1.9 (0.9 - 4.3) | 38.6 | 1.1 (0.9 - 1.4) | 45.1 | 1.3 (0.9 - 1.7) | 27.9 | 2 (1.1 - 3.6) | 39.0 | 1,3 (1,1 - 1,6) | 20.5 | 3,2 (1,2 - 8,4) | 14.4 | 3 (1,2 - 7,2) | |  | 45-64 |  |  | 38.0 | 3.5 (1.6 - 8) | 56.2 | 1.6 (1.2 - 2) | 60.3 | 1.7 (1.2 - 2.3) | 38.6 | 2.8 (1.6 - 5) | 55.1 | 1,9 (1,5 - 2,3) | 30.3 | 4,7 (1,8 - 12,3) | 19.5 | 4 (1,7 - 9,7) | |  | >65 |  |  | 85.7 | 8 (3.5 - 18.1) | 79.2 | 2.2 (1.7 - 3) | 75.0 | 2.1 (1.4 - 3.1) | 71.4 | 5.2 (2.7 - 9.9) | 87.8 | 3 (2,5 - 3,6) | 43.3 | 6,7 (2,4 - 18,9) | 21.7 | 4,5 (1,4 - 14,9) | | **Educational level** | |  |  |  |  |  |  |  |  |  |  |  |  |  |  |  |  | |  | High |  |  | 9.9 | **1** | 20.3 | **1** | 33.0 | **1** | 25.6 | **1** | 32.1 | **1** | 21.9 | **1** | 9.3 | **1** | |  | Middle |  |  | 19.6 | 2 (0.9 - 4.3) | 30.9 | 1.5 (0.9 - 2.6) | 44.0 | 1.3 (1 - 1.8) | 25.0 | 1 (0.7 - 1.4) | 41.6 | 1,3 (1,1 - 1,5) | 34.9 | 1,6 (1,2 - 2,1) | 15.9 | 1,7 (1,1 - 2,6) | |  | Low |  |  | 42.2 | 4.3 (2 - 9) | 54.9 | 2.7 (1.6 - 4.5) | 57.3 | 1.7 (1.3 - 2.4) | 54.4 | 2.1 (1.5 - 3) | 59.4 | 1,8 (1,6 - 2,2) | 62.5 | 2,9 (1,6 - 5) | 26.1 | 2,8 (1,8 - 4,3) | |  | >Low |  |  | 80.0 | 8.1 (3.5 - 18.6) | 58.8 | 2.9 (1.6 - 5.2) | 65.1 | 2 (1.4 - 2.8) | 66.7 | 2.6 (1.1 - 6) | 77.9 | 2,4 (2,1 - 2,9) |  |  | 26.9 | 2,9 (0,6 - 13) | | **Occupational categories** | | |  |  |  |  |  |  |  |  |  |  |  |  |  |  |  | |  | Non-manual skilled |  |  | 6.7 | **1** | 37.2 | **1** | 37.9 | **1** | 24.7 | **1** | 28.1 | **1** | - | **-** | 9.7 | **1** | |  | Non-nanual non-skilled | |  | 16.3 | 2.4 (0.7 - 8.8) | 42.9 | 1.2 (0.8 - 1.7) | 44.9 | 1.2 (0.8 - 1.7) | 23.7 | 1 (0.6 - 1.5) | 41.5 | 1,5 (1,2 - 1,8) | - | 0 | 12.8 | 1,3 (0,8 - 2,1) | |  | Manual skilled |  |  | 19.0 | 2.9 (0.9 - 9.3) | 43.9 | 1.2 (0.8 - 1.8) | 59.9 | 1.6 (1.1 - 2.2) | 43.4 | 1.8 (1.1 - 2.7) | 52.3 | 1,9 (1,4 - 2,4) | - | 0 | 15.0 | 1,6 (0,6 - 4,3) | |  | Manual non-skilled |  |  | 33.1 | 5.0 (1.6 - 15.2) | 44.4 | 1.2 (0.8 - 1.8) | 40.0 | 1.1 (0.7 - 1.6) | 35.5 | 1.4 (0.9 - 2.3) | 57.8 | 2,1 (1,7 - 2,6) | - | 0 | 24.8 | 2,6 (1,6 - 4) | | **Men** | |  |  | 22.9 |  | 43.8 |  | 43.4 |  | 22.9 |  | 34.5 |  | 18.1 |  | 9.2 |  | | **Age groups** | |  |  |  |  |  |  |  |  |  |  |  |  |  |  |  |  | |  | < 25 |  |  | 18.5 | **1** | 18.8 | **1** | 27.6 | **1** | 11.8 | **1** | 20.6 | **1** | 7.7 | **1** | 7.4 | **1** | |  | 25-44 |  |  | 17.0 | 0.9 (0.6 - 1.4) | 38.8 | 2.1 (1.5 - 2.8) | 41.7 | 1.5 (1.2 - 1.9) | 16.4 | 1.4 (0.9 - 2.2) | 29.7 | 1,4 (1,1 - 1,8) | 12.6 | 1,6 (0,7 - 4) | 6.4 | 0,9 (0,4 - 1,8) | |  | 45-64 |  |  | 36.2 | 2 (1.3 - 3) | 61.4 | 3.3 (2.4 - 4.4) | 59.0 | 2.1 (1.7 - 2.8) | 32.0 | 2.7 (1.7 - 4.2) | 46.4 | 2,3 (1,8 - 2,8) | 24.0 | 3,1 (1,3 - 7,4) | 13.6 | 1,9 (0,9 - 3,7) | |  | >65 |  |  | 46.4 | 2.5 (1.5 - 4.3) | 75.0 | 4 (2.9 - 5.4) | 70.8 | 2.6 (1.8 - 3.6) | 57.1 | 4.9 (3 - 7.8) | 55.5 | 2,7 (2,1 - 3,5) | 31.7 | 4,1 (1,6 - 10,7) | 10.6 | 1,4 (0,4 - 4,6) | | **Educational level** | |  |  |  |  |  |  |  |  |  |  |  |  |  |  |  |  | |  | High |  |  | 44.4 | **1** | 26.8 | **1** | 31.7 | **1** | 16.3 | **1** | 26.0 | **1** | 12.5 | **1** | 6.9 | **1** | |  | Middle |  |  | 38.5 | 1.9 (1.1 - 3.2) | 24.2 | 0.9 (0.5 - 1.6) | 37.1 | 1.2 (0.9 - 1.5) | 16.1 | 1 (0.6 - 1.5) | 34.2 | 1,3 (1,1 - 1,6) | 27.9 | 2,2 (1,6 - 3) | 8.5 | 1,2 (0,7 - 2,1) | |  | Low |  |  | 20.7 | 3.5 (2.1 - 5.9) | 52.3 | 2 (1.2 - 3.3) | 49.9 | 1.6 (1.2 - 2) | 38.1 | 2.3 (1.6 - 3.5) | 47.2 | 1,8 (1,5 - 2,2) | 36.7 | 2,9 (1,7 - 4,9) | 13.3 | 1,9 (1,1 - 3,3) | |  | >Low |  |  | 10.9 | 4.1 (2 - 8.2) | 62.7 | 2.3 (1.4 - 4) | 56.9 | 1.8 (1.3 - 2.4) | 40.7 | 2.5 (1.5 - 4.1) | 64.0 | 2,5 (2 - 3,1) |  |  | 34.0 | 4,9 (1,7 - 14,1) | | **Occupational categories** | | |  |  |  |  |  |  |  |  |  |  |  |  |  |  |  | |  | Non-manual skilled |  |  | 18.2 | 1 | 23.6 | **1** | 30.0 | **1** | 16.7 | **1** | 24.7 | **1** | - | **-** | 5.8 | **1** | |  | Non-nanual non-skilled | |  | 16.2 | 0.9 (0.4 - 1.8) | 33.7 | 1.4 (0.8 - 2.5) | 36.4 | 1.2 (0.8 - 1.9) | 25.2 | 1.5 (0.8 - 2.7) | 29.6 | 1,2 (1 - 1,5) | - | 0 | 8.4 | 1,4 (0,8 - 2,8) | |  | Manual skilled |  |  | 28.4 | 1.6 (0.9 - 2.6) | 47.1 | 2 (1.2 - 3.2) | 45.3 | 1.5 (1 - 2.2) | 24.1 | 1.4 (0.8 - 2.5) | 40.9 | 1,7 (1,3 - 2) | - | 0 | 7.5 | 1,3 (0,6 - 2,7) | |  | Manual non-skilled |  |  | 22.5 | 1.2 (0.8 - 2) | 45.6 | 1.9 (1.2 - 3.2) | 46.1 | 1.5 (1 - 2.3) | 20.2 | 1.2 (0.7 - 2.2) | 42.8 | 1,7 (1,4 - 2,2) | - | 0 | 16.1 | 2,8 (1,5 - 5,1) | | % prevalence of poor self-perceived health | | | |  |  |  |  |  |  |  |  |  |  |  |  |  |  | | Kzt Kuznets relative index | | |  |  |  |  |  |  |  |  |  |  |  |  |  |  |  | | CI 95% Confindence Interval | | |  |  |  |  |  |  |  |  |  |  |  |  |  |  |  | |  |  |  |  |  |  |  |  |  |
| --- | --- | --- | --- | --- | --- | --- | --- | --- | --- | --- | --- | --- | --- | --- | --- | --- | --- | --- | --- | --- | --- | --- | --- | --- | --- | --- | --- | --- | --- | --- | --- | --- | --- | --- | --- | --- | --- | --- | --- | --- | --- | --- | --- | --- | --- | --- | --- | --- | --- | --- | --- | --- | --- | --- | --- | --- | --- | --- | --- | --- | --- | --- | --- | --- | --- | --- | --- | --- | --- | --- | --- | --- | --- | --- | --- | --- | --- | --- | --- | --- | --- | --- | --- | --- | --- | --- | --- | --- | --- | --- | --- | --- | --- | --- | --- | --- | --- | --- | --- | --- | --- | --- | --- | --- | --- | --- | --- | --- | --- | --- | --- | --- | --- | --- | --- | --- | --- | --- | --- | --- | --- | --- | --- | --- | --- | --- | --- | --- | --- | --- | --- | --- | --- | --- | --- | --- | --- | --- | --- | --- | --- | --- | --- | --- | --- | --- | --- | --- | --- | --- | --- | --- | --- | --- | --- | --- | --- | --- | --- | --- | --- | --- | --- | --- | --- | --- | --- | --- | --- | --- | --- | --- | --- | --- | --- | --- | --- | --- | --- | --- | --- | --- | --- | --- | --- | --- | --- | --- | --- | --- | --- | --- | --- | --- | --- | --- | --- | --- | --- | --- | --- | --- | --- | --- | --- | --- | --- | --- | --- | --- | --- | --- | --- | --- | --- | --- | --- | --- | --- | --- | --- | --- | --- | --- | --- | --- | --- | --- | --- | --- | --- | --- | --- | --- | --- | --- | --- | --- | --- | --- | --- | --- | --- | --- | --- | --- | --- | --- | --- | --- | --- | --- | --- | --- | --- | --- | --- | --- | --- | --- | --- | --- | --- | --- | --- | --- | --- | --- | --- | --- | --- | --- | --- | --- | --- | --- | --- | --- | --- | --- | --- | --- | --- | --- | --- | --- | --- | --- | --- | --- | --- | --- | --- | --- | --- | --- | --- | --- | --- | --- | --- | --- | --- | --- | --- | --- | --- | --- | --- | --- | --- | --- | --- | --- | --- | --- | --- | --- | --- | --- | --- | --- | --- | --- | --- | --- | --- | --- | --- | --- | --- | --- | --- | --- | --- | --- | --- | --- | --- | --- | --- | --- | --- | --- | --- | --- | --- | --- | --- | --- | --- | --- | --- | --- | --- | --- | --- | --- | --- | --- | --- | --- | --- | --- | --- | --- | --- | --- | --- | --- | --- | --- | --- | --- | --- | --- | --- | --- | --- | --- | --- | --- | --- | --- | --- | --- | --- | --- | --- | --- | --- | --- | --- | --- | --- | --- | --- | --- | --- | --- | --- | --- | --- | --- | --- | --- | --- | --- | --- | --- | --- | --- | --- | --- | --- | --- | --- | --- | --- | --- | --- | --- | --- | --- | --- | --- | --- | --- | --- | --- | --- | --- | --- | --- | --- | --- | --- | --- | --- | --- | --- | --- | --- | --- | --- | --- | --- | --- | --- | --- | --- | --- | --- | --- | --- | --- | --- | --- | --- | --- | --- | --- | --- | --- | --- | --- | --- | --- | --- | --- | --- | --- | --- | --- | --- | --- | --- | --- | --- | --- | --- | --- | --- | --- | --- | --- | --- | --- | --- | --- | --- | --- | --- | --- | --- | --- | --- | --- | --- | --- | --- | --- | --- | --- | --- | --- | --- | --- | --- | --- | --- | --- | --- | --- | --- | --- | --- | --- | --- | --- | --- | --- | --- | --- | --- | --- | --- | --- | --- | --- | --- | --- | --- | --- | --- | --- | --- | --- | --- | --- | --- | --- | --- | --- | --- | --- | --- | --- | --- | --- | --- | --- | --- | --- | --- | --- | --- | --- | --- | --- | --- | --- | --- | --- | --- | --- | --- | --- | --- | --- | --- | --- | --- | --- | --- | --- | --- | --- | --- | --- | --- | --- | --- | --- | --- | --- | --- | --- | --- | --- | --- | --- | --- | --- | --- | --- | --- | --- | --- | --- | --- | --- | --- | --- | --- | --- | --- | --- | --- | --- | --- | --- | --- | --- | --- | --- | --- | --- | --- | --- | --- | --- | --- | --- | --- | --- | --- | --- | --- | --- | --- | --- | --- | --- | --- | --- | --- | --- | --- | --- | --- | --- | --- | --- | --- | --- | --- | --- | --- | --- | --- | --- | --- | --- | --- | --- | --- | --- | --- | --- | --- | --- | --- | --- | --- | --- | --- | --- | --- | --- | --- | --- | --- | --- | --- | --- | --- | --- | --- | --- | --- | --- | --- | --- | --- | --- | --- | --- | --- | --- | --- | --- | --- | --- | --- | --- | --- | --- | --- | --- | --- | --- | --- | --- | --- | --- | --- | --- | --- | --- | --- | --- | --- | --- | --- | --- | --- | --- | --- | --- | --- | --- | --- | --- | --- | --- | --- | --- | --- | --- | --- | --- | --- | --- | --- | --- | --- | --- | --- | --- | --- | --- | --- | --- | --- | --- | --- | --- | --- | --- | --- | --- | --- | --- | --- | --- | --- | --- | --- | --- | --- | --- | --- | --- | --- | --- | --- | --- | --- | --- | --- | --- | --- | --- | --- | --- | --- | --- | --- | --- | --- | --- | --- | --- | --- | --- | --- | --- | --- | --- | --- | --- | --- | --- | --- | --- | --- | --- | --- | --- | --- | --- | --- | --- | --- | --- | --- | --- | --- | --- | --- | --- | --- | --- | --- | --- | --- | --- | --- | --- | --- | --- | --- | --- | --- | --- | --- | --- | --- | --- | --- | --- | --- | --- | --- | --- | --- | --- | --- | --- | --- | --- | --- | --- | --- | --- | --- | --- | --- | --- | --- | --- | --- | --- | --- | --- | --- | --- | --- | --- | --- | --- | --- | --- | --- | --- | --- | --- | --- | --- | --- | --- | --- | --- | --- | --- | --- | --- | --- | --- | --- | --- | --- | --- | --- | --- | --- | --- | --- | --- | --- | --- | --- | --- | --- | --- | --- | --- | --- | --- | --- | --- | --- | --- | --- | --- | --- | --- | --- | --- | --- | --- | --- | --- | --- | --- | --- | --- | --- | --- | --- | --- | --- | --- | --- | --- | --- | --- | --- | --- | --- | --- | --- | --- | --- | --- | --- | --- | --- | --- | --- | --- | --- | --- | --- | --- | --- | --- | --- | --- | --- | --- | --- | --- | --- | --- | --- | --- | --- | --- | --- | --- | --- | --- | --- | --- | --- | --- | --- | --- | --- | --- | --- | --- | --- | --- | --- | --- | --- | --- | --- | --- | --- | --- | --- | --- | --- | --- | --- | --- | --- | --- | --- | --- | --- | --- | --- | --- | --- | --- | --- | --- | --- | --- | --- | --- | --- | --- | --- | --- | --- | --- | --- | --- | --- | --- | --- | --- | --- | --- | --- | --- | --- | --- | --- | --- | --- | --- | --- | --- | --- | --- | --- | --- | --- | --- | --- | --- | --- | --- | --- | --- | --- | --- | --- | --- | --- | --- | --- | --- | --- | --- | --- | --- | --- | --- | --- | --- | --- | --- | --- | --- | --- | --- | --- | --- | --- | --- | --- | --- | --- | --- | --- | --- | --- | --- | --- | --- | --- | --- | --- | --- | --- | --- | --- | --- | --- | --- | --- | --- | --- | --- | --- | --- | --- | --- | --- | --- | --- | --- | --- | --- | --- | --- | --- | --- | --- | --- | --- | --- | --- | --- | --- | --- | --- | --- | --- | --- | --- | --- | --- | --- | --- | --- | --- | --- | --- | --- | --- | --- | --- | --- | --- | --- | --- | --- | --- | --- | --- | --- | --- | --- | --- | --- | --- | --- | --- | --- | --- | --- | --- | --- | --- | --- | --- | --- | --- | --- | --- | --- | --- | --- | --- | --- | --- | --- | --- | --- | --- | --- | --- | --- | --- | --- | --- | --- | --- | --- | --- | --- | --- | --- | --- | --- | --- | --- | --- | --- | --- | --- | --- | --- | --- | --- | --- | --- | --- | --- | --- | --- | --- | --- | --- | --- | --- | --- | --- | --- | --- | --- | --- | --- | --- | --- | --- | --- | --- | --- | --- | --- | --- | --- | --- | --- | --- | --- | --- | --- | --- | --- | --- | --- | --- | --- | --- | --- | --- | --- | --- | --- | --- | --- | --- | --- | --- | --- | --- | --- | --- | --- | --- | --- | --- | --- | --- | --- | --- | --- | --- | --- | --- | --- | --- | --- | --- | --- | --- | --- | --- | --- | --- | --- | --- | --- | --- | --- | --- | --- | --- | --- | --- | --- | --- | --- | --- | --- | --- | --- | --- | --- | --- | --- | --- | --- | --- | --- | --- | --- | --- | --- | --- | --- | --- | --- | --- | --- | --- | --- | --- | --- | --- | --- | --- | --- | --- | --- | --- | --- | --- | --- | --- | --- | --- | --- | --- | --- | --- | --- | --- | --- | --- | --- | --- | --- | --- | --- | --- | --- | --- | --- | --- | --- | --- | --- | --- | --- | --- | --- | --- | --- | --- | --- | --- | --- | --- | --- | --- | --- | --- | --- | --- | --- | --- | --- | --- | --- | --- | --- | --- | --- | --- | --- | --- | --- | --- | --- | --- |
